# Supplementary material for: The photosystem I assembly apparatus consisting of Ycf3–Y3IP1 and Ycf4 modules
Source: PubMed Central journal article supplement (PMC6015050; doi:10.1038/s41467-018-04823-3), 2018-06-22
Supplement: 41467_2018_4823_MOESM1_ESM.pdf [file 41467_2018_4823_MOESM1_ESM.pdf]

**Supplementary information**

**The photosystem I assembly apparatus consisting of Ycf3-Y3IP1 and Ycf4 modules**

**Nellaepalli et al**

## Supplementary Figure 1

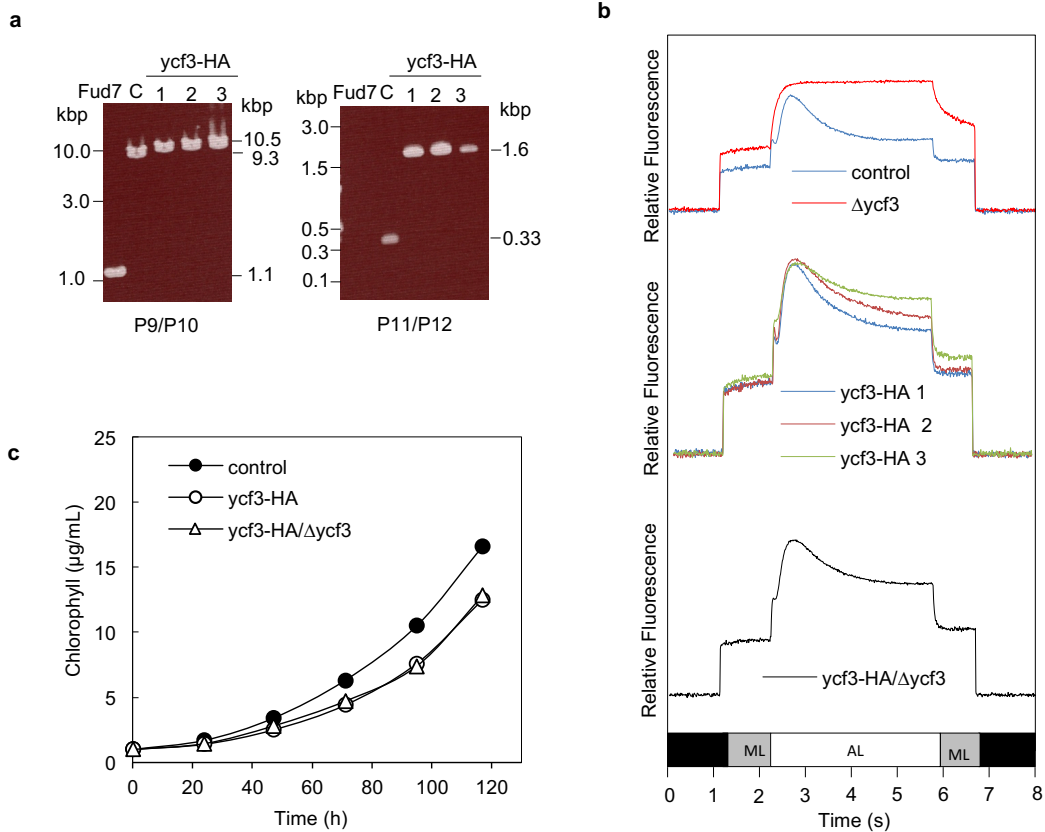

**Supplementary Figure 1. Characterization of *ycf3*-HA and *ycf3*-HA/ $\Delta ycf3$  mutants.** (a) Confirmation of the genotype of the *ycf3*-HA mutants (clones 1-3), control strain (C), and Fud7. Total cellular DNA was amplified by PCR using P9/P10 primers (left) or P11/P12 primers (right). A 1.1 kbp PCR product using P9/P10 primers from Fud7 shows the deletion around the *psbA* gene while a 9.3 kbp PCR product from control indicates the presence of the *psbA* gene. A 10.5 kbp PCR product from *ycf3*-HA (clones 1-3) mutants indicates the insertion of the *ycf3*-HA expression cassette. Using P11/P12 primers, no PCR product was amplified from Fud7 while a 0.33 kbp PCR product from control was amplified, indicating the absence and the presence of *psbA* gene, respectively. A 1.6 kbp PCR product from *ycf3*-HA (clones 1-3) mutants indicates the insertion of the expression cassette. (b) Chl *a* fluorescence kinetics measured with a Dual-PAM.  $\Delta ycf3$  mutant showed no PSI activity, whereas *ycf3*-HA (clones 1-3) and *ycf3*-HA/ $\Delta ycf3$  mutants showed PSI activity like control strain. ML; measuring light, AL; actinic light. (c) The growth of control, *ycf3*-HA, and *ycf3*-HA/ $\Delta ycf3$  mutants in liquid HSM media under illumination at  $50 \mu\text{mol photons m}^{-2} \text{s}^{-1}$ .

## Supplementary Figure 2

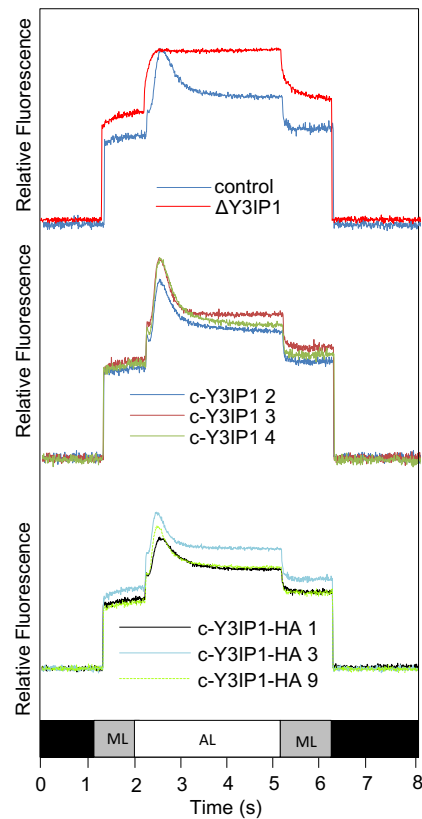

**Supplementary Figure 2. Chl *a* fluorescence induction kinetics.** Cells of control, ΔY3IP1, c-Y3IP1 (clones 2-4), and c-Y3IP1-HA (clones 1, 3, and 9) were grown in liquid TAP medium to a mid-log growth phase under the light of 5-50  $\mu\text{mol photon m}^{-2} \text{s}^{-1}$  and adapted in the dark for 30 min before the measurements with a Dual-PAM fluorescence spectrometry. ΔY3IP1 showed no PSI activity, whereas ycf3-HA and ycf3-HA/Δycf3 mutants showed PSI activity like control strain. ML; measuring light, AL; actinic light.

## Supplementary Figure 3

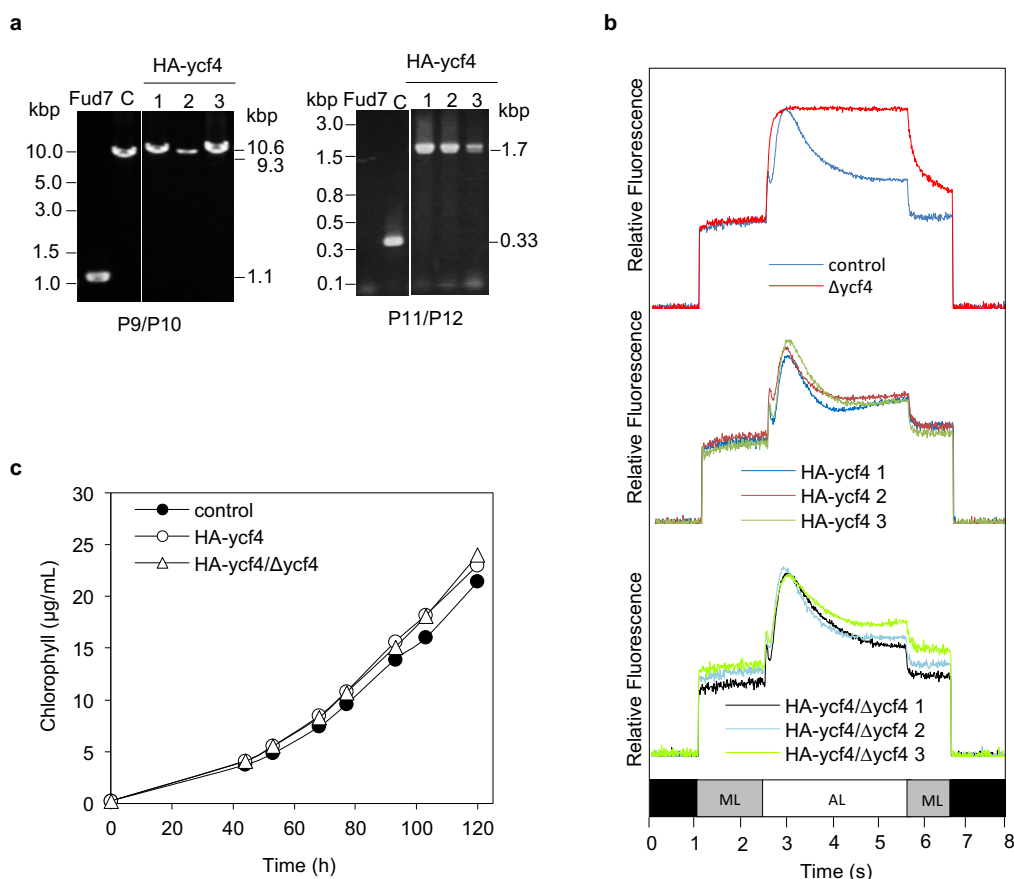

**Supplementary Figure 3. Characterization of HA-ycf4 and HA-ycf4/Δycf4 mutants.** (a) Confirmation of the genotype of the HA-ycf4 mutants (clones 1-3), control strain (C), and Fud7. Total cellular DNA was amplified by PCR using P9/P10 primers (left) or P11/P12 primers (right). A 1.1 kbp fragment from Fud7 using P9/P10 primers shows the deletion around the *psbA* gene while a 9.3 kbp fragment from control indicates the presence of the *psbA* gene. A 10.6 kbp PCR product from HA-ycf4 (clones 1-3) mutants indicate the insertion of the expression cassette. A 1.7 kbp fragment obtained using P11/P12 primers confirmed the insertion of the expression cassette in the HA-ycf4 (clones 1-3) mutants. (b) Chl *a* fluorescence kinetics measured with a Dual-PAM. Δycf4 mutant showed no PSI activity, whereas HA-ycf4 (clones 1-3) and HA-ycf4/Δycf4 (clones 1-3) mutants showed PSI activity like control strain. ML; measuring light, AL; actinic light. (c) The growth of control, HA-ycf4, and HA-ycf4/Δycf4 mutants in liquid HSM media at 50 μmol photons m<sup>-2</sup> s<sup>-1</sup>.



## Supplementary Figure 4

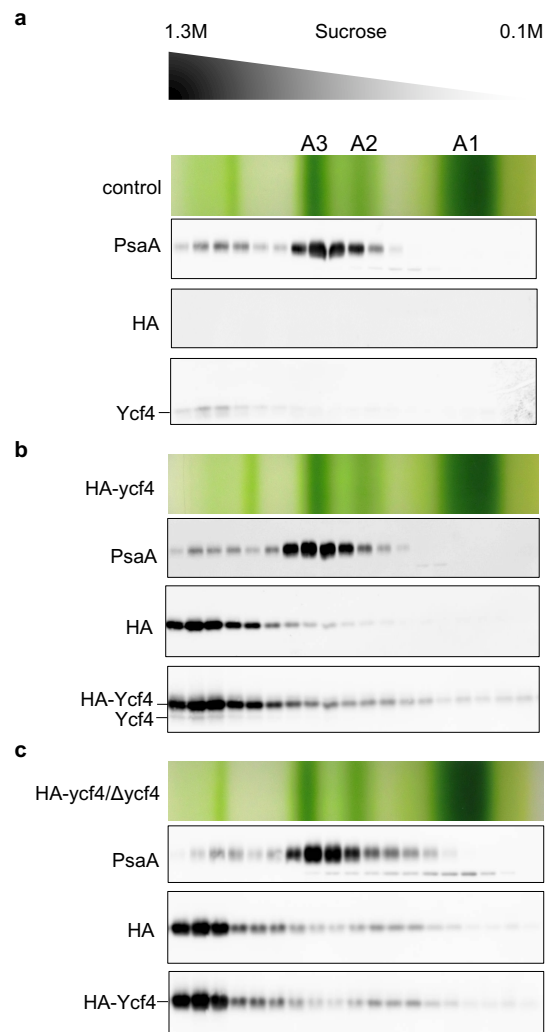

**Supplementary Figure 4. HA-Ycf4 is part of a large complex.** Thylakoid membranes were solubilized with 1%  $\beta$ -DM and separated by SDG ultracentrifugation. (a) control, (b) HA-ycf4, (c) HA-ycf4/ $\Delta$ ycf4. Ycf4 and HA-Ycf4 from the three strains were separated near the bottom of the gradient, indicating HA-Ycf4, as well as Ycf4, are part of a large complex.

## Supplementary Figure 5

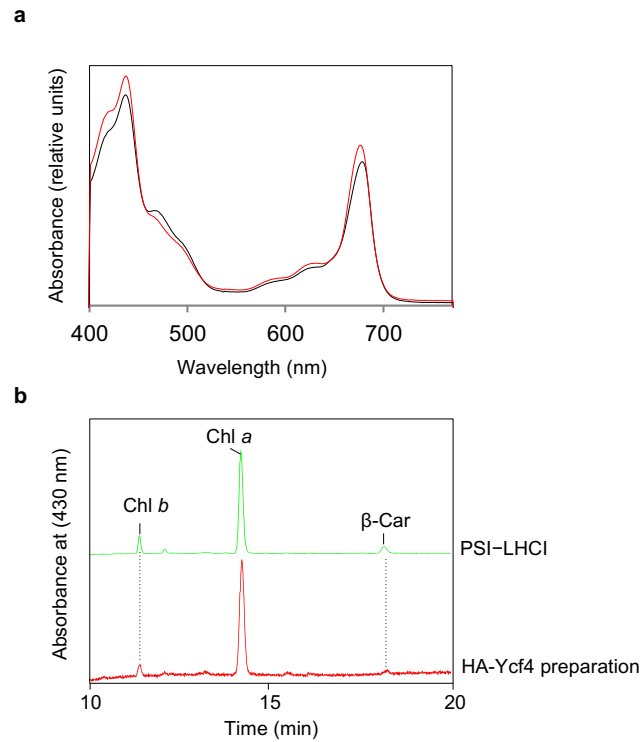

**Supplementary Figure 5. Pigment analysis in the affinity-purified HA-Ycf4 preparation.** (a) Absorption spectra of the HA-Ycf4 (red line) and PSI-LHCI preparations (black line). (b) Pigments extracted from the HA-Ycf4 and PSI-LHCI preparations were separated and identified by HPLC. Chl *a/b* ratio was estimated as 7.9 and 4.7 in HA-Ycf4 and PSI-LHCI preparations, respectively.

## Supplementary Figure 6

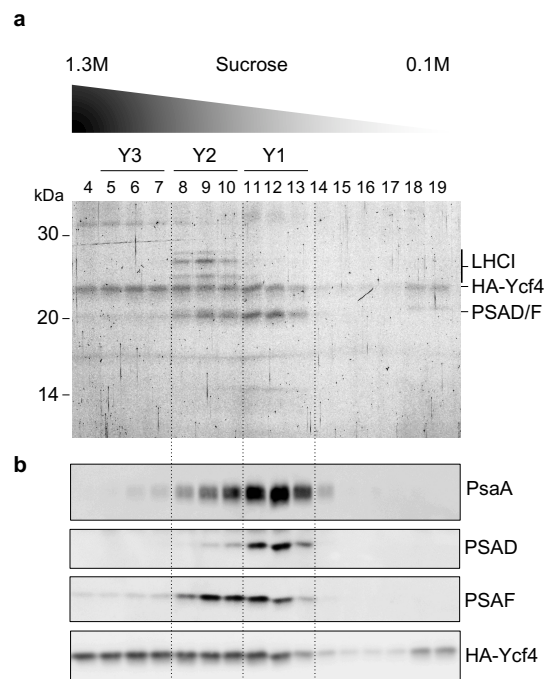

**Supplementary Figure 6. Separation of the purified HA-Ycf4 by SDG ultracentrifugation. (a)** Fractions collected from SDG of HA-Ycf4 preparation (Fig. 5a) were subjected to SDS-PAGE, and the polypeptides were visualized by staining with Flamingo. **(b)** The presence of PSI subunits in Y1 and Y2 was determined by immunoblotting using anti-PsaA, PSAD/F, and Ycf4 antibodies. HA-Ycf4 was fractionated broadly in Y1, Y2, and Y3.



## Supplementary Table 1

### Ycf3-HA preparation

| Protein | Accession   | Peptide     | Position | Z | $\Delta M$ | Xcorr |
|---------|-------------|-------------|----------|---|------------|-------|
| PsaB    | NP_958404.1 | FSQGLAQDPTR | 9-20     | 2 | 0.83       | 3.73  |

### HA-Ycf4 preparation

| Protein | Accession   | Peptide         | Position | Z | $\Delta M$ | Xcorr |
|---------|-------------|-----------------|----------|---|------------|-------|
| PsaA    | NP_958375.1 | FSNYEAWLSDPTHIK | 98-112   | 2 | 1.83       | 5.06  |
|         |             | DYDPTNNYNNLLDR  | 416-429  | 2 | 0.54       | 4.26  |
|         |             | LLDAGVDPK       | 227-235  | 2 | 0.92       | 3.21  |
|         |             | EIPLPHDLLLNLR   | 236-247  | 2 | 1.66       | 2.75  |
| PsaB    | NP_958404.1 | FSQGLAQDPTR     | 9-20     | 2 | 0.12       | 3.58  |
|         |             | DKPVALSIVQAR    | 696-707  | 2 | 0.79       | 3.42  |
|         |             | ALYGFDFLLSSK    | 471-482  | 2 | 0.66       | 3.37  |
|         |             | TPLANLVYWK      | 686-695  | 2 | -0.07      | 2.78  |

**Supplementary Table 1. PsaA and PsaB Polypeptides identified with LC-MS/MS.** The stained bands of 66 kDa from Fig. 1c and Fig. 4c for Ycf3-HA and HA-Ycf4 preparations, respectively, were excised and digested with trypsin and the resulting polypeptides were subjected to LC-MS/MS.

## Supplementary Table 2

| Name | Oligonucleotide sequence                                |
|------|---------------------------------------------------------|
| P1   | 5'-AGAAATCCATGCCAAGAACGCAAAGAAATGATAATTTTATCGAT         |
| P2   | 5'-CCCCCGCATGCTTAAGTAGCTAAACCTGTTAGACGT                 |
| P3   | 5'-AGAAATCCATGACACAAAATAATATTTTAATTAGACGTTATA           |
| P4   | 5'-CCCCCGCATGCTTAGGCTTCTAAAGAACTTGTA AAAAGTT            |
| P5   | 5'-CTAACAGGTTTAGCTACTTATCCATATGATGTTCCAGATTATGC         |
| P6   | 5'-TTAAGCATAATCTGGAACATCATATGGATAAGTAGCTAAACCTGTTAGACGT |
| P7   | 5'-CCAGATTATGCTACACAAAATAATATTTTAATTAGACGTTATATTATTGTAG |
| P8   | 5'-AACATCATATGGATAACATGGATTTCTCCTTATAATAACAATTATT       |
| P9   | 5'-GTTCTGACGCGTTTGTGAGGCTTTATTAAC                       |
| P10  | 5'-TTCTGAAACCGTTCGTGCTGTGCTAGACAG                       |
| P11  | 5'-TTTCGCCATATGTAGACGTTTAATTGCTAC                       |
| P12  | 5'-AGTACCATCAGATATTGCTAGCATGGATAC                       |
| P13  | 5'-CGGCATATGAGCGCGCAGCTCCGAGCTCTTAG                     |
| P14  | 5'-CCTCTAGATTACTTGAGAGAGTTGTAGAACAGGAT                  |
| P15  | 5'-GGGCATATGAGCGCGCAGCTCCGAGCTCTTA                      |
| P16  | 5'-CCTCTAGAATTACTTGAGAGAGTTGTAGAACAGG                   |
| P17  | 5'-GATTACGAATTCGTATTGCGCTCAAGTGCCTGCACGACGA             |
| P18  | 5'-CACGTCGTAGGGTACTTGAGAGAGTTGTAGAACAGGATGAGG           |

**Supplementary Table 2.** Oligonucleotides used in this study
